# Supplementary material for: A facile and sustainable one-pot approach to the aqueous and low-temperature PET-to-UiO-66(Zr) upcycling
Source: Royal Society of Chemistry journal article supplement (doi:10.1039/d1cc06250f), 2021-12-22
Supplement: d1cc06250f1.pdf [file d1cc06250f1.pdf]

## A facile and sustainable one-pot approach to the aqueous and low-temperature PET-to-UiO-66(Zr) upcycling

Maria Crespo Ribadeneyra, James King, Maria Magdalena Titirici and Petra Ágota Szilágyi <sup>\*b</sup>

a. Department of Chemical Engineering, Imperial College London, South Kensington Campus, London, SW7 2AZ, UK.

b. School of Engineering and Materials Science, Queen Mary University of London, Mile End Road, E1 4NS London, UK.

[\\*p.szilagyi@qmul.ac.uk](mailto:p.szilagyi@qmul.ac.uk)

### Experimental

FTIR spectra were acquired using an attenuated total reflectance (ATR) setup using a Bruker Tensor 27 spectrometer. A resolution of 4 cm<sup>-1</sup> was used with a range of 400-4,000 cm<sup>-1</sup>, with 32 scans using the OPUS software package.

X-ray photoelectron spectra were acquired under ultrahigh vacuum (<5×10<sup>-7</sup> Pa) on a Thermo Fisher Nexsa XPS System with a monochromated Al K-alpha X-ray source (photon energy = 1486.7 eV). A pass energy of 50 eV was used with a flood gun as an electron source for charge neutralisation. The data was analysed using the OriginPro software. Peaks were fitted with a Gaussian numerical convolution after baseline and background corrections.

PXRD data was collected on a Panalytical X'Pert Pro in reflection mode using a Cu K<sub>α</sub> anode (λ = 1.54178 Å), divergence slit, Ni-filter and a range of 5-120° 2θ.

The N<sub>2</sub> adsorption isotherms were obtained at 77 K using a Tristar II Plus Micromeritics equipment. The specific surface areas were calculated with the multipoint Brunauer–Emmett–Teller (BET) method and pore size distributions (PSD) were obtained using a non-local density functional theory (NLDFT) model from the adsorption line of the isotherm.

Thermal Gravimetric analysis was performed using a Pyris-PerkinElmer TGA 8000 instrument under air atmosphere, at 10 °C min<sup>-1</sup> in the 30 - 900 °C range.

Differential Scanning Calorimetry was carried out on a PerkinElmer LAMBDA™ 365 at a heating rate of 50 °C min<sup>-1</sup> between 20 and 270 °C.

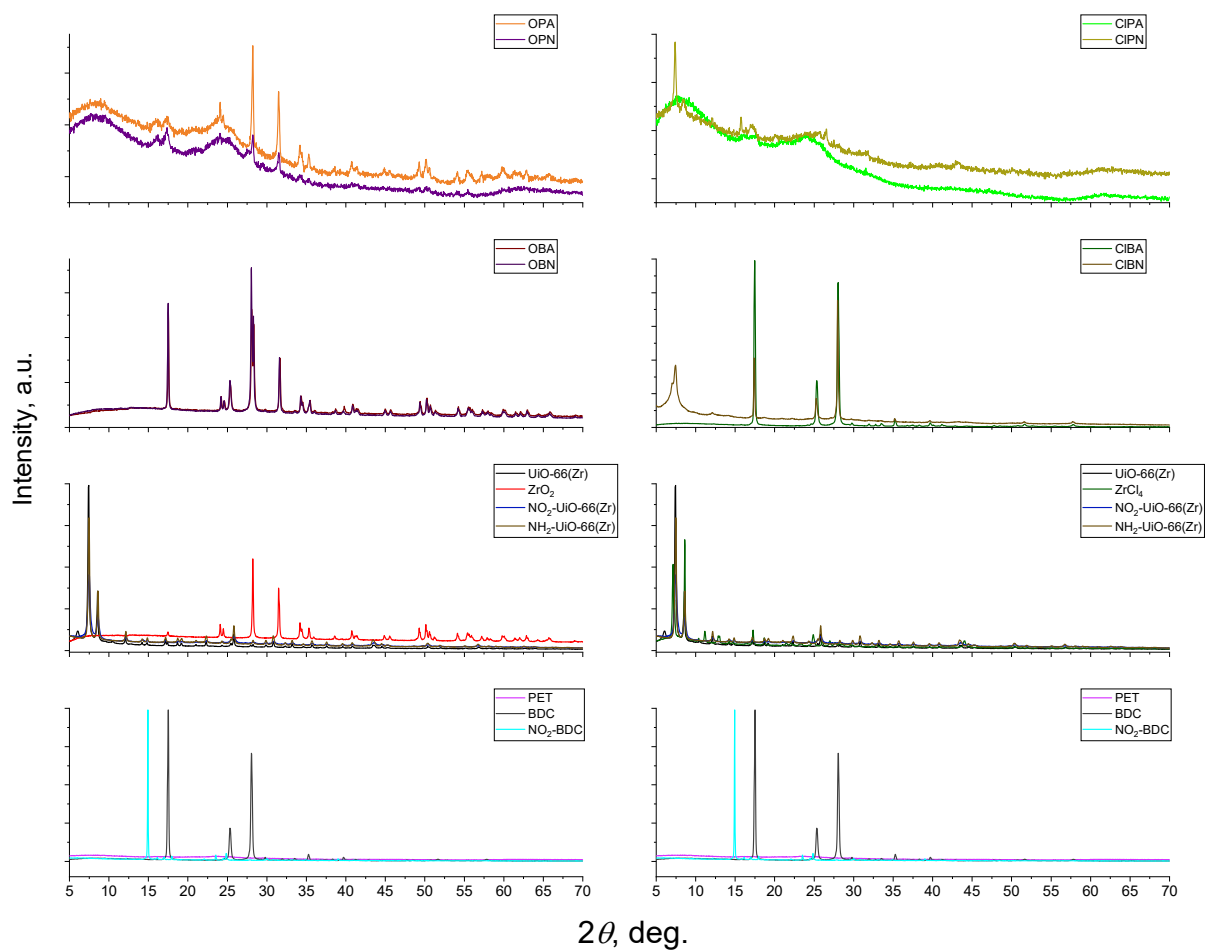

Figure S1 PXRD traces for the various reaction mixtures and reference materials

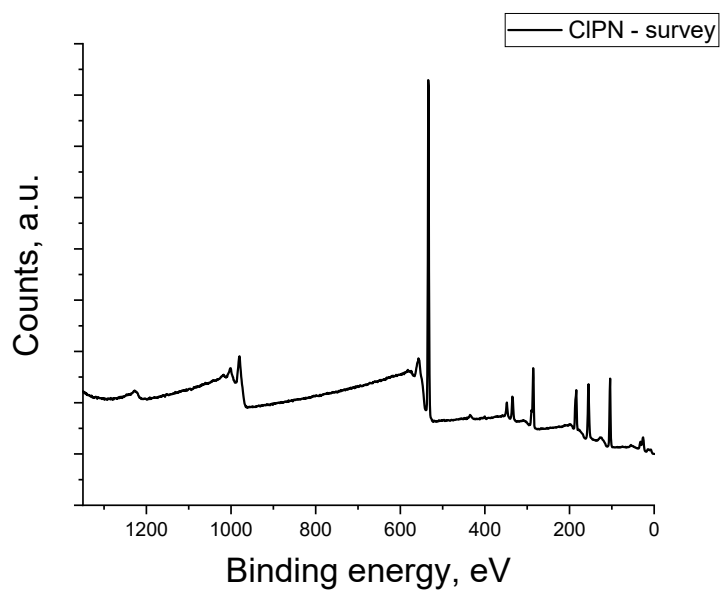

Figure S2 XPS survey spectrum for the CIPN sample

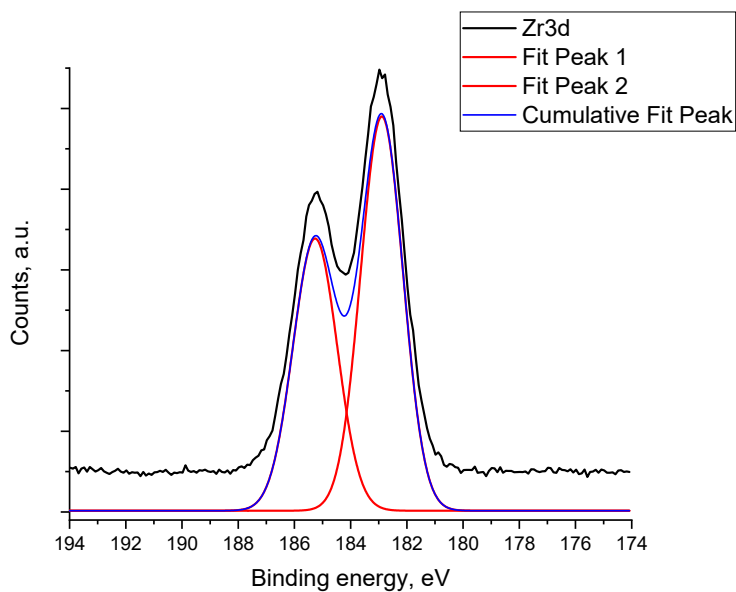

**Figure S3** High-resolution Zr3d ZPS spectrum for CIPN

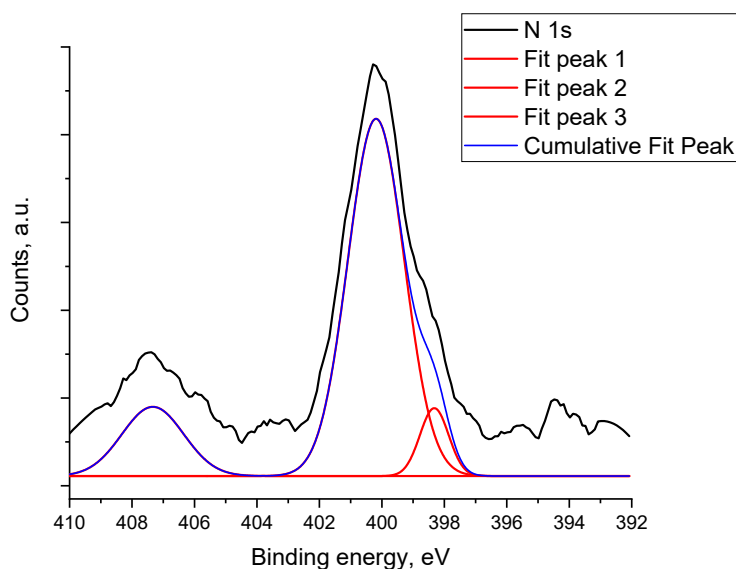

**Figure S4** High-resolution N1s spectrum for CIPN

**Table S1** Binding energies as obtained from fitting the XPS spectra

| XPS peak assignment            | XPS peak position, [eV] | Fitted peak areas / proportion |
|--------------------------------|-------------------------|--------------------------------|
| Zr 3d <sub>3/2</sub>           | 185.3                   |                                |
| Zr 3d <sub>5/2</sub>           | 182.9                   |                                |
| N 1s (-NO <sub>2</sub> groups) | 407.3                   | 0.391 / 16.2%                  |
| N 1s (-NH <sub>2</sub> groups) | 400.2                   | 1.849 / 76.4%                  |
| N 1s (-NH <sub>2</sub> groups) | 398.3                   | 0.178 / 7.4%                   |

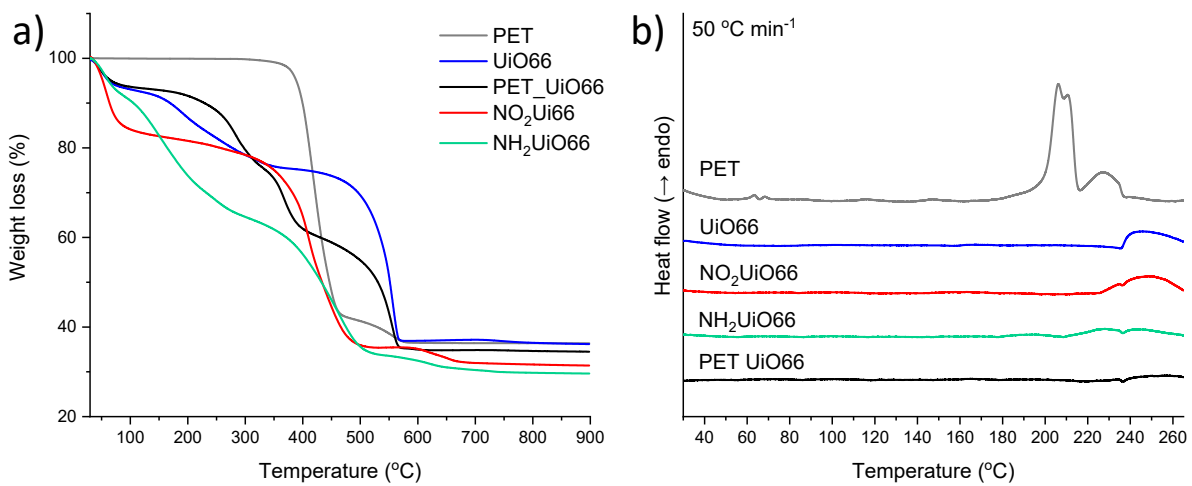

**Figure S5** Thermal gravimetric analysis (a) and Differential Scanning Calorimetry data (b) of PET-derived MOF and reference materials
